# Supplementary material for: Single-cell genetic heterogeneity linked to immune infiltration in glioblastoma
Source: bioRxiv or medRxiv preprint supplement (doi:10.1101/2021.09.20.461080), 2021-09-23

# Supplemental Fig. 1

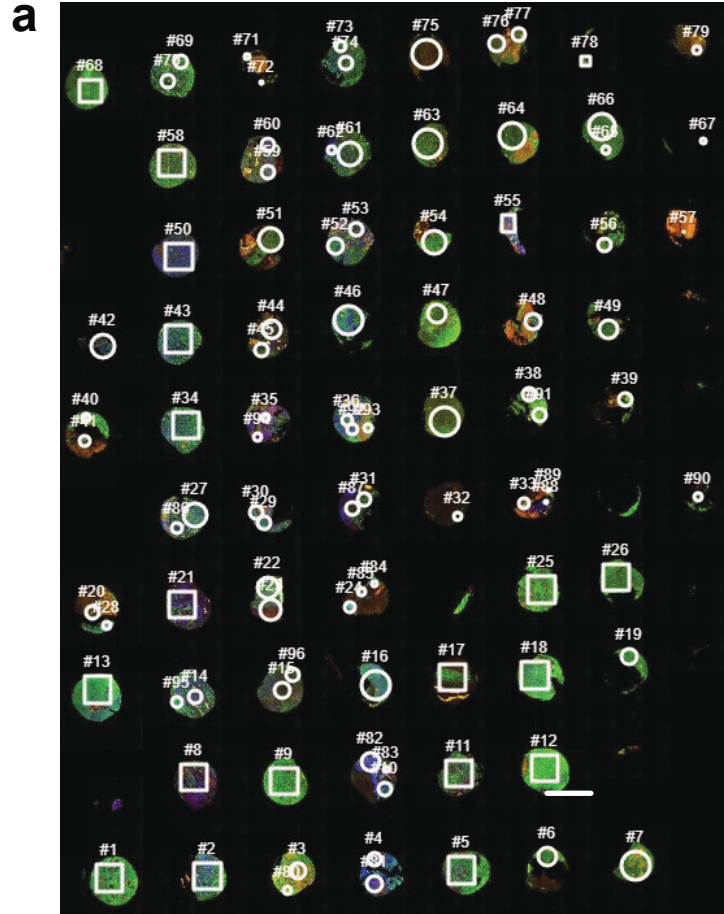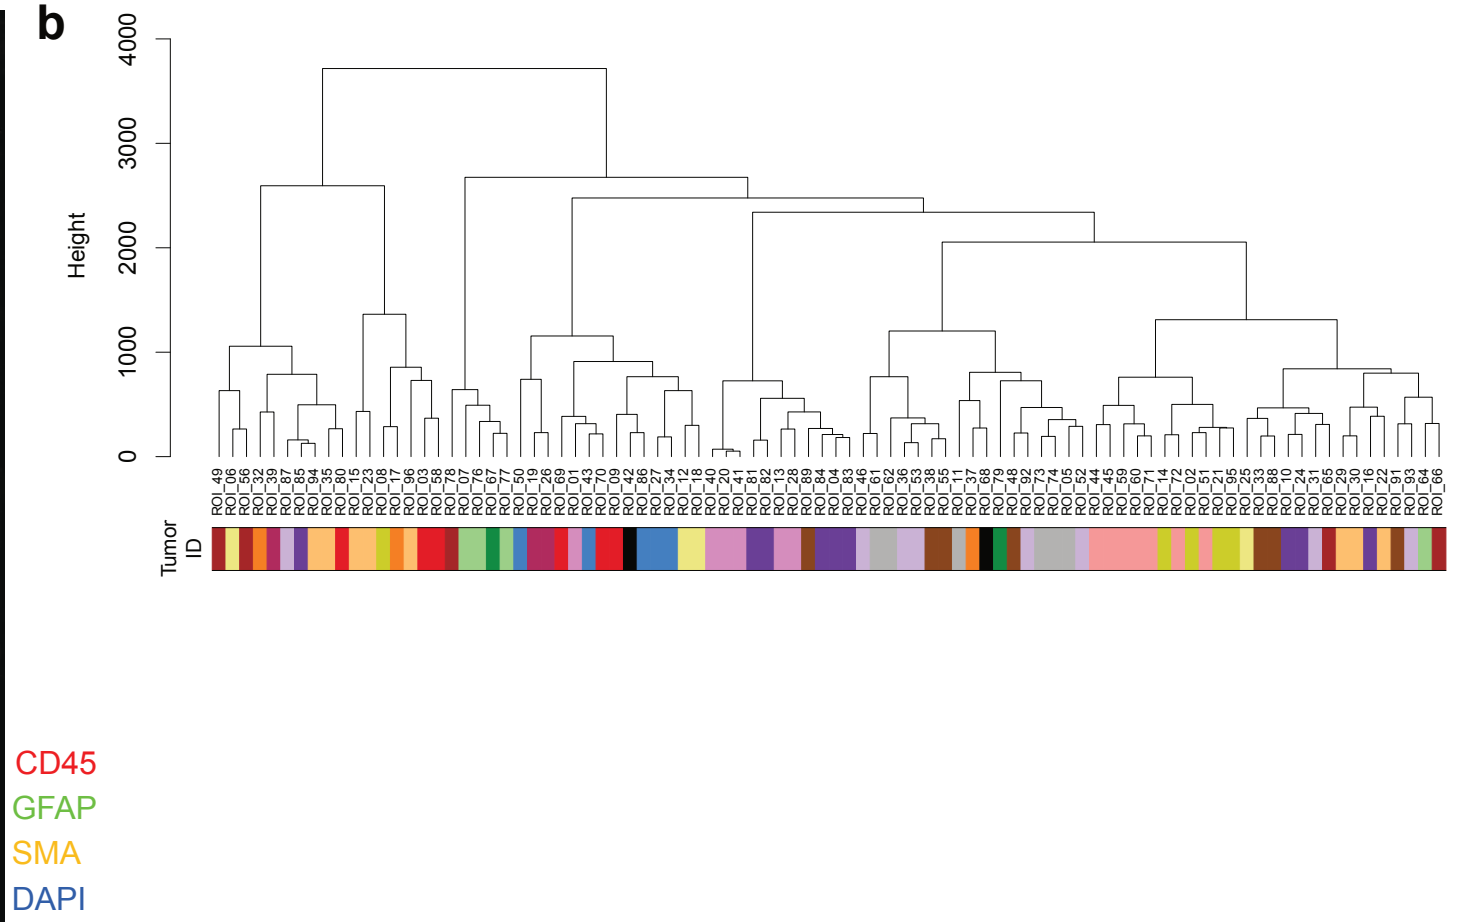

# Supplemental Fig. 2

**a**

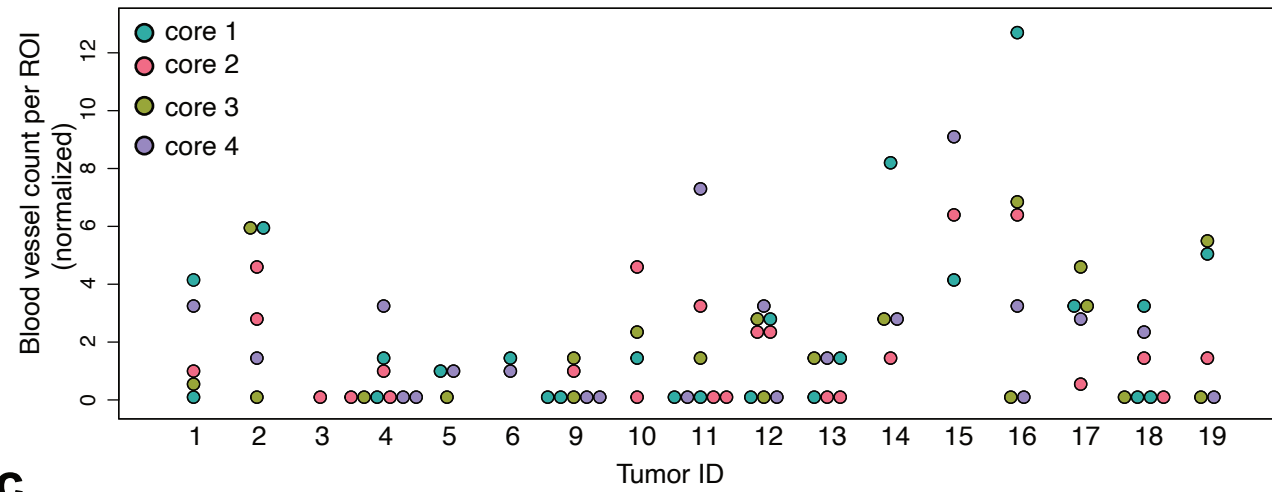

**b**

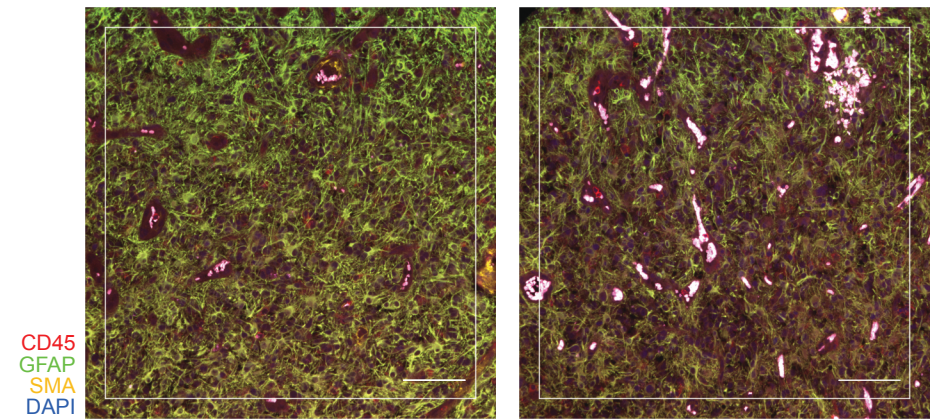

**c**

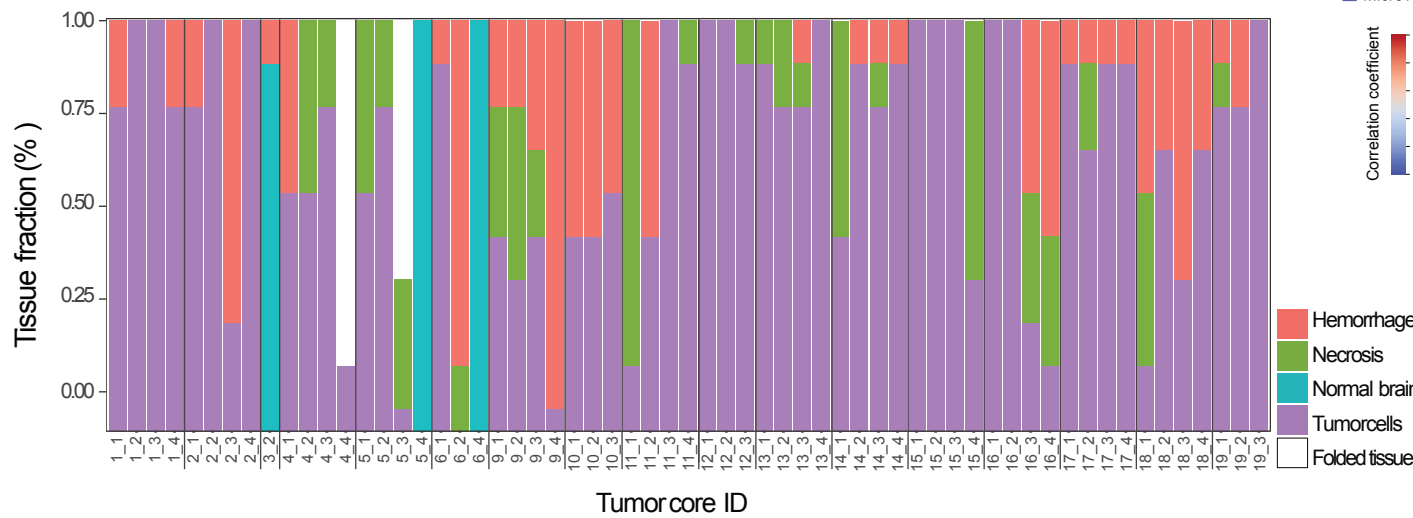

**d**

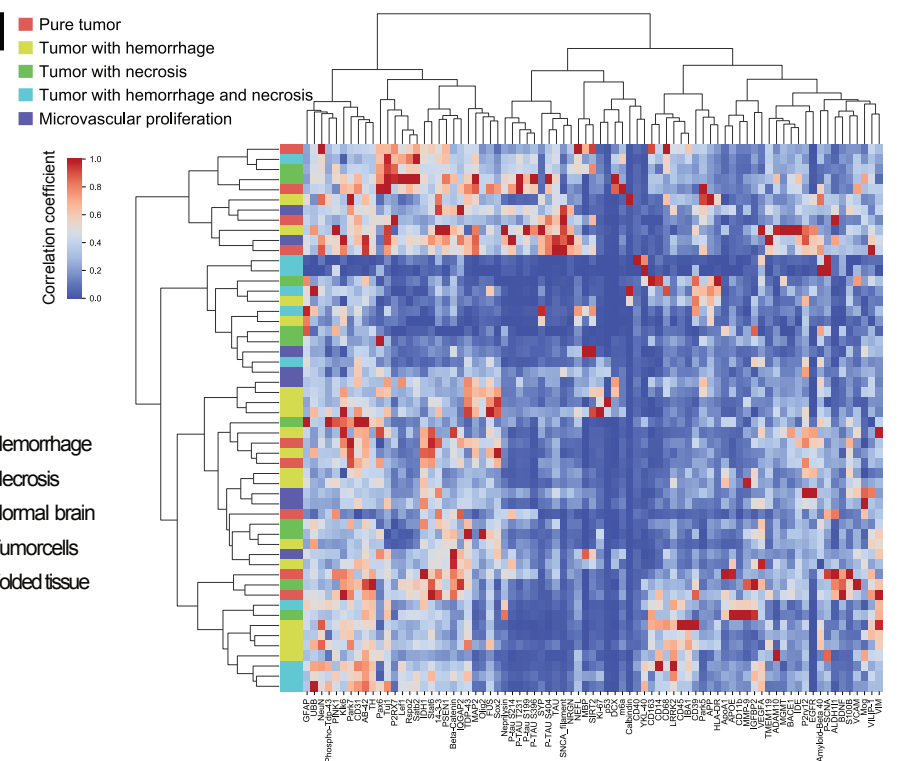

a

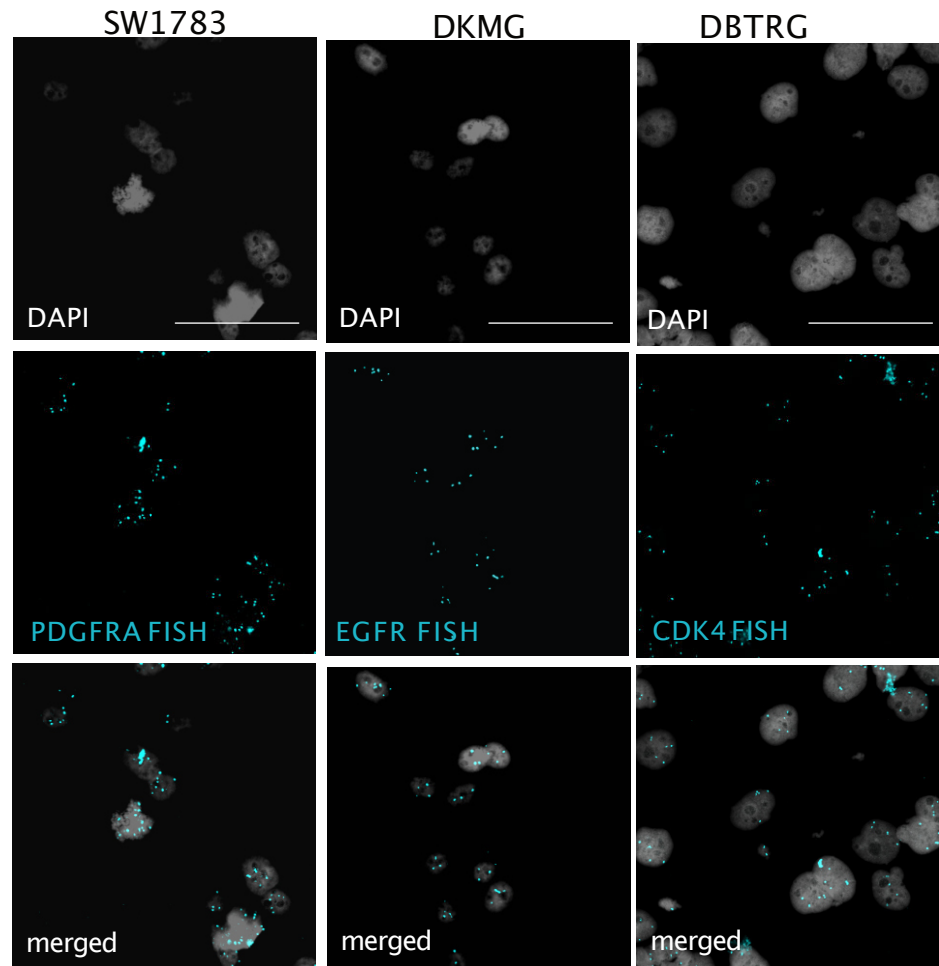

HEK293T

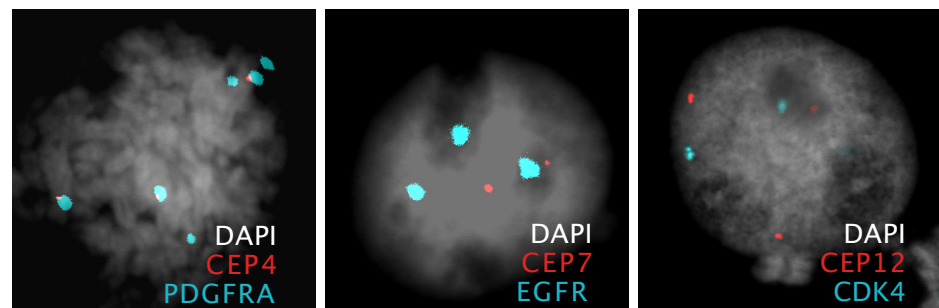

b

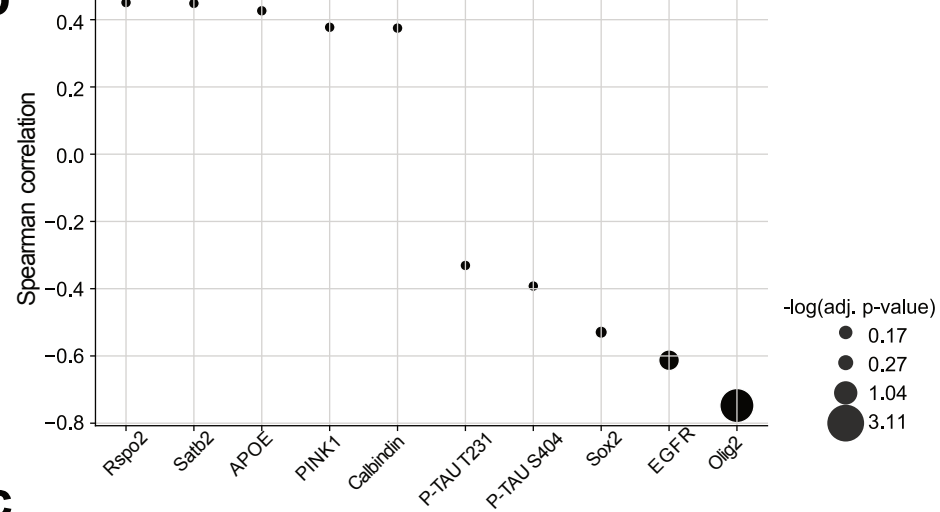

c

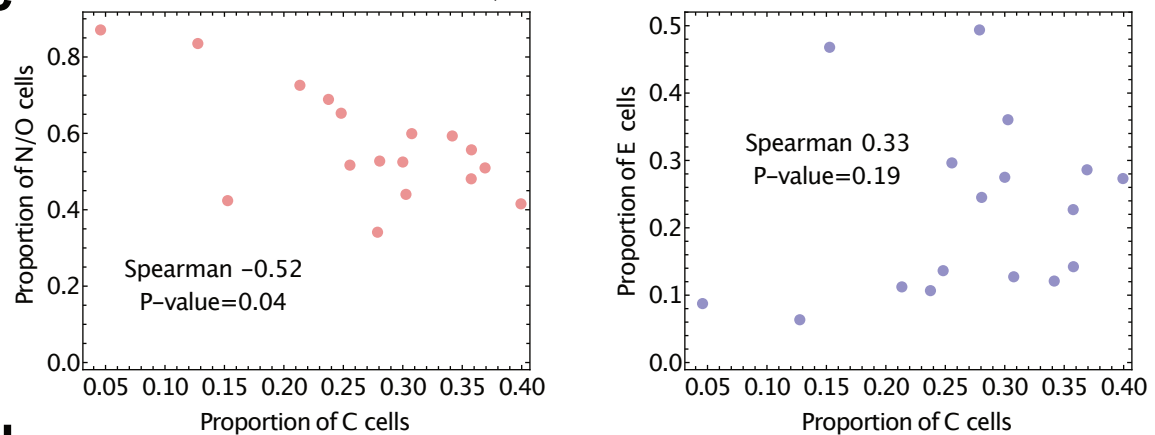

d

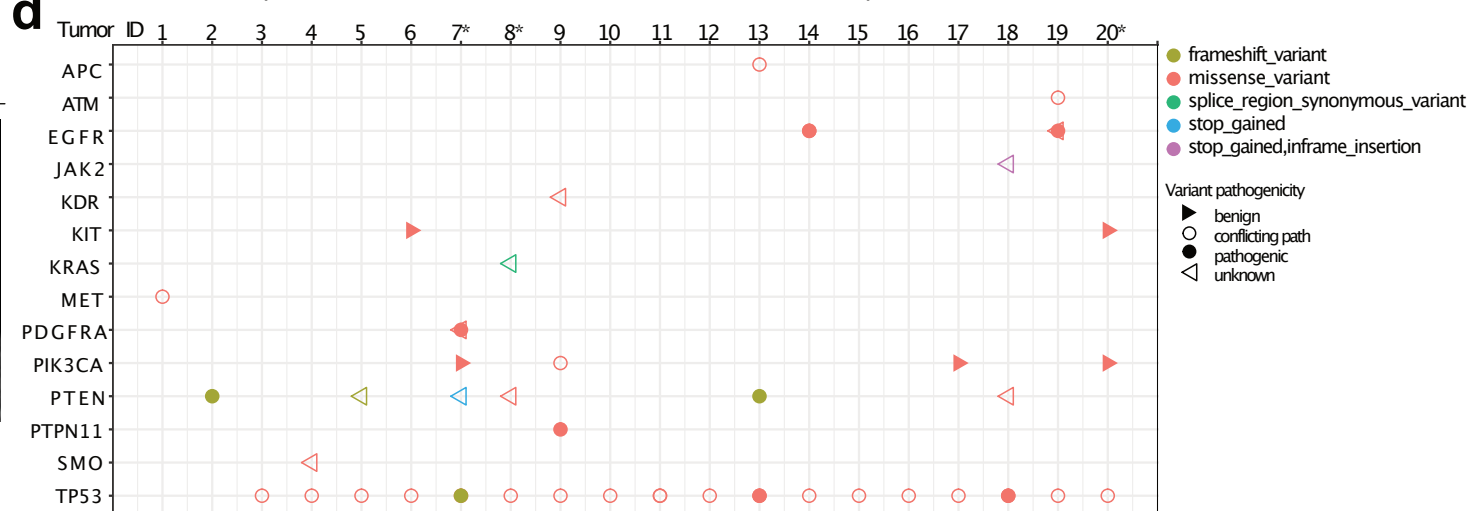

# Supplemental Fig. 4

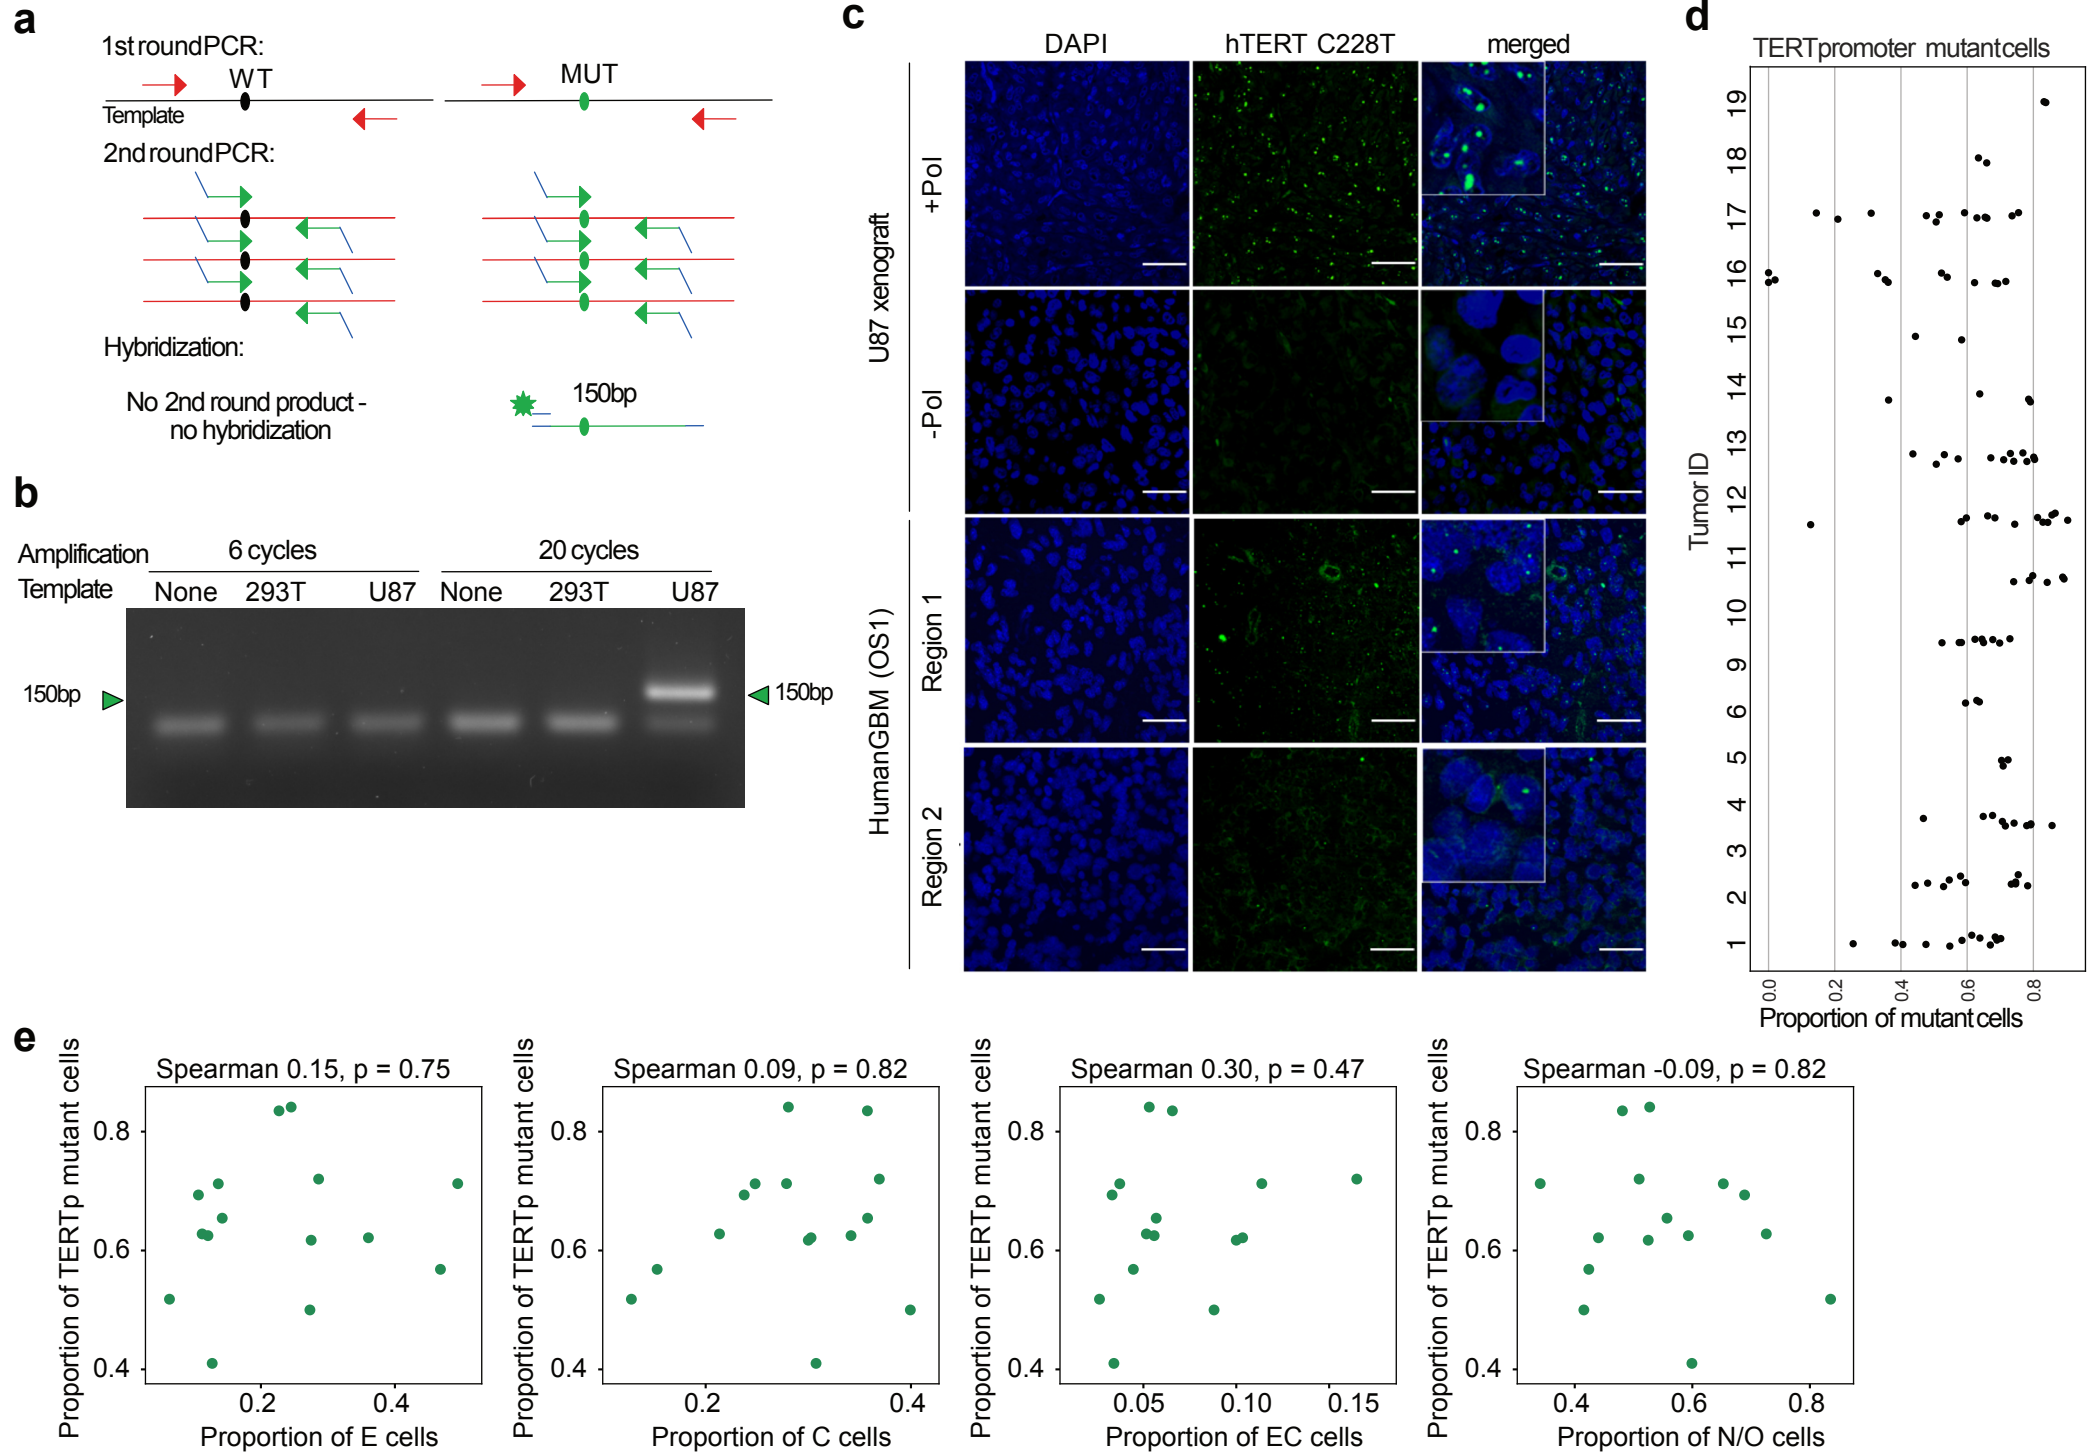

Supplement: Supplementary file [file media-1.pdf]
